# Supplementary material
Source: HighWire-hosted journal article supplement (http://www.annfammed.org/highwire/filestream/649/field_highwire_adjunct_files/0/Ibanez_Supp_Table_Figures.pdf)
Supplement: Ibanez_Supp_Table_Figures.pdf [file Ibanez_Supp_Table_Figures.pdf]

**Supplemental materials for:**

Hajjar F, Saint-Lary O, Cadwallader J, et al. Development of primary care research in North America, Europe, and Australia From 1974 to 2017. *Ann Fam Med.* 2019;17(1):49-51.

Supplemental Table 2: Number of publications in primary care in 21 countries (1974 to 2017) – Detailed data

| DATES                                | GERMANY         | AUSTRIA        | BELGIUM         | CANADA          | CYPRUS        | DENMARK        | SPAIN          | ESTONIA        | UNITED STATES    | FINLAND        | FRANCE          | GREECE          | IRELAND          | ITALY             | LUXEMBOURG     | NETHERLANDS       | CZECH REPUBLIC  | UNITED KINGDOM  | SLOVENIA       | SWEDEN         | AUSTRALIA         |
|--------------------------------------|-----------------|----------------|-----------------|-----------------|---------------|----------------|----------------|----------------|------------------|----------------|-----------------|-----------------|------------------|-------------------|----------------|-------------------|-----------------|-----------------|----------------|----------------|-------------------|
| 1974                                 | 2               | 6              | 2               | 50              | 0             | 19             | 0              | 0              | 303              | 3              | 7               | 0               | 9                | 1                 | 0              | 7                 | 4               | 202             | 0              | 30             | 47                |
| 1975                                 | 3               | 0              | 0               | 55              | 0             | 17             | 0              | 0              | 352              | 4              | 4               | 0               | 7                | 2                 | 0              | 3                 | 2               | 171             | 0              | 23             | 39                |
| 1976                                 | 1               | 3              | 1               | 51              | 0             | 42             | 0              | 0              | 307              | 2              | 10              | 0               | 5                | 1                 | 0              | 6                 | 1               | 170             | 0              | 18             | 76                |
| 1977                                 | 5               | 2              | 1               | 40              | 0             | 19             | 0              | 0              | 368              | 7              | 14              | 2               | 7                | 2                 | 0              | 3                 | 4               | 163             | 0              | 13             | 44                |
| 1978                                 | 7               | 1              | 2               | 40              | 0             | 13             | 4              | 0              | 419              | 7              | 13              | 0               | 4                | 4                 | 0              | 8                 | 2               | 189             | 0              | 16             | 33                |
| 1979                                 | 3               | 1              | 1               | 43              | 0             | 29             | 1              | 1              | 423              | 3              | 13              | 1               | 1                | 0                 | 0              | 10                | 4               | 188             | 0              | 14             | 27                |
| 1980                                 | 3               | 0              | 3               | 40              | 0             | 31             | 5              | 0              | 385              | 1              | 9               | 1               | 4                | 2                 | 0              | 14                | 5               | 206             | 0              | 21             | 33                |
| 1981                                 | 3               | 2              | 2               | 14              | 0             | 19             | 3              | 0              | 291              | 1              | 6               | 0               | 4                | 3                 | 0              | 14                | 3               | 273             | 0              | 6              | 36                |
| 1982                                 | 4               | 1              | 3               | 25              | 0             | 14             | 5              | 0              | 283              | 2              | 6               | 0               | 8                | 2                 | 0              | 11                | 2               | 256             | 0              | 11             | 28                |
| 1983                                 | 0               | 1              | 2               | 36              | 0             | 25             | 2              | 0              | 306              | 8              | 2               | 0               | 2                | 1                 | 0              | 12                | 3               | 271             | 0              | 12             | 8                 |
| 1984                                 | 0               | 1              | 4               | 52              | 0             | 26             | 11             | 0              | 301              | 8              | 13              | 0               | 8                | 2                 | 0              | 14                | 6               | 302             | 0              | 21             | 30                |
| 1985                                 | 1               | 3              | 2               | 37              | 0             | 16             | 6              | 0              | 350              | 4              | 10              | 0               | 0                | 5                 | 0              | 14                | 4               | 258             | 0              | 17             | 19                |
| 1986                                 | 4               | 3              | 4               | 34              | 0             | 37             | 15             | 0              | 403              | 3              | 4               | 1               | 5                | 8                 | 0              | 17                | 5               | 249             | 0              | 15             | 33                |
| 1987                                 | 1               | 3              | 4               | 44              | 0             | 20             | 8              | 0              | 382              | 12             | 7               | 0               | 4                | 10                | 0              | 23                | 7               | 254             | 0              | 21             | 29                |
| 1988                                 | 2               | 3              | 1               | 46              | 1             | 29             | 17             | 0              | 414              | 7              | 11              | 1               | 4                | 5                 | 0              | 21                | 1               | 255             | 0              | 23             | 37                |
| 1989                                 | 4               | 3              | 7               | 52              | 0             | 37             | 25             | 0              | 500              | 7              | 12              | 1               | 6                | 13                | 0              | 23                | 2               | 308             | 0              | 28             | 47                |
| 1990                                 | 15              | 1              | 7               | 57              | 2             | 36             | 50             | 1              | 565              | 10             | 10              | 1               | 7                | 11                | 0              | 39                | 3               | 338             | 0              | 32             | 60                |
| 1991                                 | 15              | 0              | 2               | 55              | 0             | 34             | 41             | 0              | 612              | 6              | 11              | 3               | 4                | 14                | 0              | 41                | 3               | 332             | 0              | 53             | 75                |
| 1992                                 | 15              | 2              | 3               | 77              | 0             | 40             | 60             | 1              | 729              | 7              | 14              | 3               | 12               | 20                | 0              | 51                | 0               | 353             | 0              | 37             | 85                |
| 1993                                 | 25              | 5              | 5               | 119             | 0             | 38             | 73             | 0              | 874              | 21             | 14              | 1               | 11               | 4                 | 0              | 46                | 3               | 381             | 1              | 38             | 85                |
| 1994                                 | 33              | 1              | 6               | 96              | 0             | 22             | 72             | 0              | 1109             | 9              | 36              | 5               | 9                | 15                | 0              | 54                | 0               | 461             | 1              | 44             | 123               |
| 1995                                 | 42              | 5              | 5               | 130             | 0             | 25             | 74             | 0              | 1204             | 17             | 28              | 1               | 16               | 14                | 0              | 61                | 0               | 433             | 3              | 55             | 109               |
| 1996                                 | 62              | 4              | 4               | 109             | 0             | 22             | 94             | 1              | 1006             | 18             | 21              | 2               | 10               | 9                 | 2              | 75                | 1               | 490             | 1              | 47             | 142               |
| 1997                                 | 51              | 2              | 5               | 140             | 1             | 33             | 85             | 1              | 1252             | 20             | 27              | 1               | 12               | 22                | 0              | 67                | 6               | 494             | 2              | 44             | 132               |
| 1998                                 | 47              | 3              | 7               | 144             | 0             | 39             | 68             | 1              | 1228             | 23             | 42              | 5               | 9                | 21                | 0              | 77                | 0               | 520             | 4              | 52             | 148               |
| 1999                                 | 58              | 3              | 6               | 146             | 0             | 32             | 85             | 1              | 1158             | 18             | 34              | 4               | 8                | 22                | 0              | 89                | 2               | 584             | 4              | 56             | 164               |
| 2000                                 | 74              | 5              | 10              | 137             | 1             | 37             | 74             | 2              | 1023             | 17             | 37              | 5               | 16               | 27                | 0              | 82                | 2               | 604             | 3              | 65             | 157               |
| 2001                                 | 66              | 10             | 19              | 157             | 0             | 40             | 73             | 3              | 1124             | 28             | 49              | 4               | 19               | 27                | 0              | 89                | 2               | 594             | 2              | 75             | 227               |
| 2002                                 | 61              | 14             | 19              | 157             | 0             | 67             | 65             | 3              | 1111             | 22             | 55              | 6               | 10               | 42                | 0              | 79                | 0               | 651             | 2              | 80             | 205               |
| 2003                                 | 98              | 9              | 16              | 180             | 0             | 40             | 57             | 4              | 1208             | 29             | 79              | 4               | 13               | 51                | 0              | 88                | 3               | 713             | 5              | 76             | 251               |
| 2004                                 | 106             | 6              | 29              | 202             | 0             | 46             | 73             | 10             | 1288             | 20             | 88              | 5               | 22               | 56                | 0              | 116               | 5               | 760             | 2              | 62             | 281               |
| 2005                                 | 133             | 9              | 21              | 220             | 0             | 66             | 83             | 3              | 1293             | 28             | 97              | 9               | 19               | 75                | 0              | 156               | 3               | 825             | 2              | 65             | 297               |
| 2006                                 | 134             | 6              | 32              | 235             | 2             | 50             | 112            | 4              | 1281             | 30             | 80              | 16              | 38               | 63                | 0              | 185               | 2               | 871             | 3              | 91             | 290               |
| 2007                                 | 149             | 10             | 25              | 305             | 2             | 45             | 100            | 2              | 1358             | 28             | 103             | 13              | 47               | 72                | 0              | 195               | 0               | 806             | 2              | 88             | 335               |
| 2008                                 | 149             | 8              | 15              | 260             | 2             | 65             | 94             | 2              | 1343             | 28             | 99              | 13              | 39               | 49                | 1              | 189               | 2               | 725             | 7              | 98             | 347               |
| 2009                                 | 147             | 17             | 27              | 289             | 1             | 48             | 110            | 2              | 1322             | 31             | 124             | 11              | 57               | 64                | 1              | 170               | 3               | 643             | 9              | 85             | 281               |
| 2010                                 | 166             | 10             | 39              | 322             | 2             | 72             | 125            | 4              | 1533             | 35             | 92              | 14              | 41               | 83                | 2              | 167               | 4               | 745             | 8              | 101            | 374               |
| 2011                                 | 183             | 17             | 31              | 325             | 1             | 69             | 182            | 4              | 1668             | 26             | 112             | 11              | 49               | 59                | 0              | 183               | 2               | 795             | 10             | 80             | 396               |
| 2012                                 | 224             | 11             | 40              | 376             | 1             | 95             | 167            | 4              | 1941             | 35             | 126             | 15              | 51               | 87                | 1              | 214               | 1               | 825             | 7              | 92             | 389               |
| 2013                                 | 238             | 15             | 43              | 376             | 3             | 96             | 174            | 2              | 1969             | 44             | 112             | 11              | 60               | 96                | 0              | 201               | 4               | 828             | 8              | 113            | 470               |
| 2014                                 | 230             | 22             | 37              | 417             | 2             | 92             | 197            | 4              | 1992             | 27             | 137             | 12              | 70               | 85                | 1              | 230               | 3               | 847             | 7              | 124            | 515               |
| 2015                                 | 262             | 11             | 27              | 415             | 0             | 87             | 186            | 4              | 1999             | 30             | 147             | 6               | 55               | 112               | 1              | 237               | 3               | 936             | 4              | 138            | 492               |
| 2016                                 | 131             | 10             | 25              | 345             | 1             | 88             | 135            | 3              | 1564             | 21             | 105             | 11              | 53               | 86                | 1              | 193               | 4               | 659             | 3              | 112            | 379               |
| 2017                                 | 78              | 8              | 11              | 193             | 0             | 42             | 62             | 0              | 1003             | 9              | 70              | 4               | 32               | 46                | 1              | 104               | 4               | 516             | 0              | 70             | 242               |
| <b>Total 2017</b>                    | <b>3035</b>     | <b>257</b>     | <b>555</b>      | <b>6643</b>     | <b>22</b>     | <b>1859</b>    | <b>2873</b>    | <b>67</b>      | <b>41544</b>     | <b>716</b>     | <b>2090</b>     | <b>203</b>      | <b>867</b>       | <b>1393</b>       | <b>11</b>      | <b>3678</b>       | <b>120</b>      | <b>21444</b>    | <b>100</b>     | <b>2362</b>    | <b>7617</b>       |
| <b>ALL PUBLICATIONS MEDLINE 1974</b> | <b>424</b>      | <b>278</b>     | <b>152</b>      | <b>1183</b>     | <b>11</b>     | <b>653</b>     | <b>236</b>     | <b>13</b>      | <b>10950</b>     | <b>350</b>     | <b>749</b>      | <b>108</b>      | <b>164</b>       | <b>499</b>        | <b>1</b>       | <b>237</b>        | <b>780</b>      | <b>3754</b>     | <b>0</b>       | <b>745</b>     | <b>818</b>        |
| <b>ALL PUBLICATIONS MEDLINE 2017</b> | <b>3800</b>     | <b>432</b>     | <b>664</b>      | <b>5465</b>     | <b>69</b>     | <b>1887</b>    | <b>3166</b>    | <b>102</b>     | <b>31830</b>     | <b>1180</b>    | <b>3004</b>     | <b>660</b>      | <b>673</b>       | <b>3784</b>       | <b>22</b>      | <b>2811</b>       | <b>397</b>      | <b>7396</b>     | <b>127</b>     | <b>2653</b>    | <b>6222</b>       |
| <b>TOTAL POPULATION</b>              | <b>82521653</b> | <b>8772865</b> | <b>11351727</b> | <b>36155487</b> | <b>854802</b> | <b>5748569</b> | <b>6528024</b> | <b>1315944</b> | <b>328286400</b> | <b>5503297</b> | <b>67595000</b> | <b>10768193</b> | <b>4 784 383</b> | <b>60 589 445</b> | <b>576 249</b> | <b>17 081 507</b> | <b>10578820</b> | <b>65808573</b> | <b>2064188</b> | <b>9995153</b> | <b>24 000 300</b> |

Step 1

**Bibliographic search of terms defining or associated with PC/GP**

Bibliographic search of terms defining or associated with GP/PC since 1974 in all the studied countries (official websites of colleges, boards, national associations; academic journals; international networks like WONCA, WONCA Europe; MEDLINE and grey literature) – More information page 5.

Terms found not included  
(overly broad concept or not fulfilling  
the main purpose of the work):  
Community Health Worker,  
Comprehensive Health Care,  
Family Nurse Practitioners,  
Medicine, Physicians

Terms found included in the search:

Family doctor, Family Healthcare, Family practice, General medical practice, General medical services, General practice, General practitioner, Global family medicine, Medicine general doctor, Physicians family, Physicians primary care, Primary care, Primary care doctor, Primary care professionals, Primary care center, Primary care services, Primary health care

Selected terms were then classified into MeSH terms, entry terms, terms associated with a MeSH term, and terms not recognised in the MESH classification (= term not included)

Step 2

**Terms included and not included among those pre-selected during step 1**

All MeSH terms, entry terms and terms associated with a MeSH word were included in the bibliographic search (except those with a ∞)

| Terms found with the bibliographic search | MeSH terms               | Entry terms                                                                  | Terms associated with a MeSH term                                        | Year of introduction in the MeSH tree                         | Terms not included |
|-------------------------------------------|--------------------------|------------------------------------------------------------------------------|--------------------------------------------------------------------------|---------------------------------------------------------------|--------------------|
| Family Doctor                             |                          |                                                                              | X<br>Physicians, family                                                  |                                                               |                    |
| Family Healthcare                         |                          |                                                                              |                                                                          |                                                               | X                  |
| Family Medicine                           |                          |                                                                              | Family Practice                                                          |                                                               |                    |
| Family Practice                           | Family Practice          | Family Practices<br>Practice, Family<br>Practices, Family                    |                                                                          | 1978                                                          |                    |
| General Medical Practice                  |                          |                                                                              | General practice<br>Insurance, Health∞                                   |                                                               |                    |
| General Medical Services                  |                          |                                                                              |                                                                          |                                                               | X                  |
| General Medicine                          |                          |                                                                              | General practice                                                         |                                                               |                    |
| General Practice                          | General practice         | Practice, General                                                            |                                                                          | 2011<br>Previous indexing :<br>Family Practice (1978-2010)    |                    |
| General Practitioner                      | General practitioners    |                                                                              |                                                                          | 2011<br>Previous indexing :<br>Family Practice (1978-2010)    |                    |
| Global Family Medicine                    |                          |                                                                              |                                                                          |                                                               | X                  |
| Medicine general doctor                   |                          |                                                                              |                                                                          |                                                               | X                  |
| Physicians Family                         | Physicians, family       | Family Physician<br>Family Physicians<br>Physician, Family                   |                                                                          | 1974                                                          |                    |
| Physicians Primary Care                   | Physicians, primary care | Physician, Primary Care<br>Primary Care Physician<br>Primary Care Physicians |                                                                          | 2011<br>Previous indexing :<br>Physicians, family (1980-2010) |                    |
| Primary Care                              |                          |                                                                              | Primary Health Care<br>Primary Care Nursing∞<br>Physicians, Primary Care |                                                               |                    |

|                            |                        |                                                                                                                            |                                              |      |   |
|----------------------------|------------------------|----------------------------------------------------------------------------------------------------------------------------|----------------------------------------------|------|---|
|                            |                        |                                                                                                                            | Patient health<br>Questionnaire <sup>∞</sup> |      |   |
| Primary Care Doctor        |                        |                                                                                                                            |                                              |      | X |
| Primary Care Professionals |                        |                                                                                                                            |                                              |      | X |
| Primary Care Center        |                        |                                                                                                                            |                                              |      | X |
| Primary Care Services      |                        |                                                                                                                            | Primary Health Care                          |      |   |
| Primary Health Care        | Primary Health<br>Care | Care, Primary Health<br>Health Care, Primary<br>Primary Healthcare<br>Healthcare, Primary<br>Primary Care<br>Care, Primary |                                              | 1974 |   |

### Step 3

#### Terms included in the analysis

The terms included in the analysis are as follows:

Family doctor; Family Medicine; Family practice[MESH]; Family Practices; Practice, Family; Practices, Family; General Medical Practice; General Practice[MESH]; General Medicine; Practice, General; General practitioner; General practitioners[MESH]; Physicians family; Physicians, Family[MESH]; Family Physician; Family Physicians; Physician, Family; Physicians primary care; Physician, Primary Care; Physicians, Primary Care[MESH]; Primary Care Physician; Primary Care Physicians; Primary care; Primary Health Care[MESH]; Physicians, Primary Care; Primary Care Services; Care, Primary Health; Health Care, Primary; Primary Healthcare; Healthcare, Primary; Primary Care; Care, Primary.

The following results were excluded from the search:

Addresses, Autobiography, Bibliography, Biography, Books And Documents, Clinical Conference, Comment, Congresses, Corrected And Republished Article, Dataset, Dictionary, Directory, Duplicate Publication, Editorial, Electronic Supplementary Materials, English Abstracts, Festschrift, Government Publications, Historical Article, Interactive Tutorial, Interview, Introductory Journal Article, Lectures, Legal Cases, Legislation, Letter, News, Newspaper Article, Overall, Patient Education Handout, Periodical Index, Personal Narratives, Portraits, Published Erratum, Research Support, American Recovery And Reinvestment Act, Research Support, N.I.H., Extramural, Research Support, N.I.H., Intramural, Research Support, Non-U.S. Gov't, Research Support, U.S. Gov't, Non-P.H.S., Research Support, U.S. Gov't, P.H.S., Research Support, U.S. Government, Retracted Publication, Retraction Of Publication, Technical Report, Video-Audio Media, Webcasts

Please note:

The current Czech Republic benefited from the two MeSH terms in the search “Czech Republic” and “Czechoslovakia” (its name before the separation of the country as of the first of January 1993).

The United Kingdom benefited from five MeSH terms in the search “United Kingdom”, “England”, “Scotland”, “Wales”, and “Northern Ireland”.

**Additional information 1: Classification in the MeSH tree of the selected MeSH terms**

MeSH headings are organised in a "tree" with 16 main branches: A. Anatomy; B. Organisms; C. Diseases; D. Chemicals and Drugs; E. Analytical, Diagnostic and Therapeutic Techniques and Equipment; F. Psychiatry and Psychology; G. Phenomena and Processes; H. Disciplines and Occupations; I. Anthropology, Education, Sociology and Social Phenomena; J. Technology, Industry, Agriculture; K. Humanities; L. Information Science; M. Named Groups; N. Health Care; V. Publication Characteristics; Z. Geographical

Decreasing  
MeSH tree

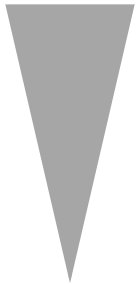

| All MeSH Categories                 |                                                                |                                                                                                 |
|-------------------------------------|----------------------------------------------------------------|-------------------------------------------------------------------------------------------------|
| H- Disciplines and Occupations      | M- Named groups                                                | N- Health care                                                                                  |
| Discipline and occupations category | Persons category                                               | Health care category                                                                            |
| Health occupations                  | Health personnel                                               | Health personnel                                                                                |
| Medicine                            | Physicians                                                     | Physicians                                                                                      |
| <b>General practice*</b>            | <b>Physicians, Family*</b><br><b>Physicians, Primary Care*</b> | <b>General practitioners*</b><br><b>Physicians, Family*</b><br><b>Physicians, Primary Care*</b> |
| <b>Family practice*</b>             |                                                                |                                                                                                 |

\* MESH terms in black and bold character were included in the search

## **Additional information 2: Choice of resources used to list the terms associated or defining GP/PC**

| <b>Country</b>        | <b>Organisation</b>                                                                                                                                                                             | <b>Website</b>                                                                                                                                                       |
|-----------------------|-------------------------------------------------------------------------------------------------------------------------------------------------------------------------------------------------|----------------------------------------------------------------------------------------------------------------------------------------------------------------------|
| <b>Austria</b>        | The Austrian Society of General Practice/Family Medicine                                                                                                                                        | <a href="https://oegam.at/">https://oegam.at/</a>                                                                                                                    |
| <b>Australie</b>      | Royal Australian College of General Practitioners<br>Formerly Australian Family Physician (AFP)                                                                                                 | <a href="https://www.racgp.org.au/home">https://www.racgp.org.au/home</a>                                                                                            |
| <b>Belgium</b>        | Belgian Society for General Practitioners/Family Physicians                                                                                                                                     | <a href="http://www.ssmg.be">www.ssmg.be</a>                                                                                                                         |
| <b>Canada</b>         | College of Family Physicians of Canada (CFPC)                                                                                                                                                   | <a href="http://www.cfpc.ca">www.cfpc.ca</a>                                                                                                                         |
| <b>Cyprus</b>         | Cyprus Medical Association Training of Family Practitioners for NHIS                                                                                                                            |                                                                                                                                                                      |
| <b>Czech Republic</b> | The Czech Society of General Practice                                                                                                                                                           | <a href="https://www.svl.cz/en/czech-society-of-general-practice/">https://www.svl.cz/en/czech-society-of-general-practice/</a>                                      |
| <b>Denmark</b>        | The Danish College of General Practitioners                                                                                                                                                     | <a href="http://www.dsam.dk/flx/english/">http://www.dsam.dk/flx/english/</a>                                                                                        |
| <b>Estonia</b>        | The Estonian Society of Family Doctors<br>Family Physicians Association of Estonia                                                                                                              | <a href="http://www.perearstiselts.ee/">http://www.perearstiselts.ee/</a>                                                                                            |
| <b>Finland</b>        | The Finnish Association for General Practice<br>Nordic Federation of General Practice                                                                                                           | <a href="http://www.syly.fi/">http://www.syly.fi/</a>                                                                                                                |
| <b>France</b>         | Collège de la Médecine Générale<br>Société française de médecine générale                                                                                                                       | <a href="http://www.lecmg.fr/internet/index.php">http://www.lecmg.fr/internet/index.php</a><br><a href="http://www.sfm.org/accueil/">http://www.sfm.org/accueil/</a> |
| <b>Germany</b>        | The German Society of General Practice/Family Medicine                                                                                                                                          | <a href="https://www.degam.de/">https://www.degam.de/</a>                                                                                                            |
| <b>Greece</b>         | The Greek Association of General Practitioners<br>Greek association of general practice/family medicine<br>Greek Company of General Medicine Doctors<br>Greek Union of Medicine General Doctors | <a href="https://elegeia.gr/">https://elegeia.gr/</a>                                                                                                                |
| <b>Ireland</b>        | The Irish College of General Practitioners                                                                                                                                                      | <a href="https://www.icgp.ie/">https://www.icgp.ie/</a>                                                                                                              |
| <b>Italy</b>          | Center for Studies and Research in General Practice<br>Italian Scientific Society for General Practice                                                                                          | <a href="http://www.csermeg.it/">http://www.csermeg.it/</a>                                                                                                          |
| <b>Luxembourg</b>     | Luxemburgish Scientific Society for General Practice                                                                                                                                            | <a href="http://www.alformec.lu/sslmg.html">http://www.alformec.lu/sslmg.html</a>                                                                                    |
| <b>Netherlands</b>    | Dutch College of General Practitioners                                                                                                                                                          | <a href="http://www.nhg.org">www.nhg.org</a>                                                                                                                         |
| <b>Scotland</b>       | RCGP Scotland                                                                                                                                                                                   | <a href="http://www.rcgp.org.uk/rcgp-near-you/rcgp-nations/rcgp-scotland.aspx">http://www.rcgp.org.uk/rcgp-near-you/rcgp-nations/rcgp-scotland.aspx</a>              |
| <b>Slovenia</b>       | The Slovenian Medical Association<br>Section for General Practice                                                                                                                               | <a href="http://www.drmed.org">www.drmed.org</a>                                                                                                                     |
| <b>Spain</b>          | The Spanish Society of Family and Community Medicine                                                                                                                                            | <a href="https://www.semfyec.es/la-semfyec/estructura/organos-de-gobierno/">https://www.semfyec.es/la-semfyec/estructura/organos-de-gobierno/</a>                    |
| <b>Sweden</b>         | The Swedish Association of General Practice                                                                                                                                                     | <a href="http://www.sfam.se/">http://www.sfam.se/</a>                                                                                                                |
| <b>United Kingdom</b> | Royal College Of General Practitioners                                                                                                                                                          | <a href="http://www.rcgp.org.uk/">http://www.rcgp.org.uk/</a>                                                                                                        |
| <b>USA</b>            | American Academy of Family Physicians<br>American Board of Family Medicine                                                                                                                      | <a href="http://www.aafp.org">www.aafp.org</a><br><a href="http://www.theabfm.org">www.theabfm.org</a>                                                               |

For Europe - More references in:

Kringos DS, Boerma WGW, Hutchinson A, et al., editors. Building primary care in a changing Europe: Case studies [Internet]. Observatory Studies Series, No. 40. Copenhagen (Denmark): European Observatory on Health Systems and Policies
